# Supplementary material for: Leaf trait variation in species-rich tropical Andean forests
Source: PubMed Central journal article supplement (PMC8113502; doi:10.1038/s41598-021-89190-8), 2021-05-11
Supplement: 41598_2021_89190_MOESM1_ESM.pdf [file 41598_2021_89190_MOESM1_ESM.pdf]

# **Leaf trait variation in species-rich tropical Andean forests**

**Jürgen Homeier, Tabea Seeler, Kerstin Pierick & Christoph Leuschner**

## **Supplementary Material**

Appendix A1: Map of the study sites

Appendix A2: The 52 tropical montane forest tree species studied and their ecological characteristics.

Appendix A3: Phylogenetic tree of the study species.

Appendix A4: Model results

Appendix A5: Intraspecific trait variation at the three study sites, tree species are ordered by their mean values and genus names of species with high or low values are given.

Appendix A6: Results of functional diversity partitioning into between- and within-species effects.

Appendix A7: PCA results.

Appendix A8: Leaf trait network characteristics at the three study sites.

## Supplementary Material

**Appendix A1:** Map of the study sites (modified after [40]).

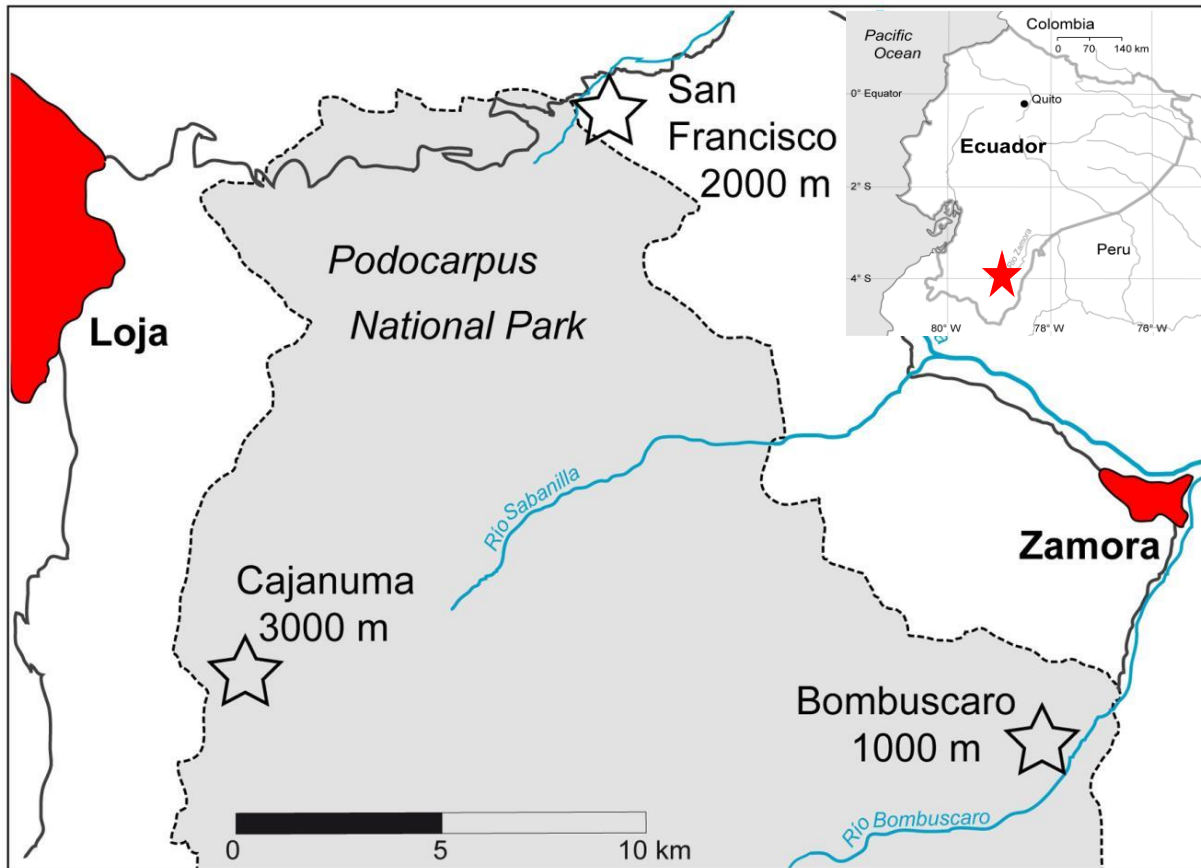

**Appendix A2:** The 52 tropical montane forest tree species studied and their ecological characteristics.

| Study site | Family          | Species                         | tree s | Successional stage<br>(Early, Intermediate, Late) | Life strategy<br>(Acquisitive, Intermediate, Conservative) | Size<br>(Understory, Intermediate, Canopy) |
|------------|-----------------|---------------------------------|--------|---------------------------------------------------|------------------------------------------------------------|--------------------------------------------|
| 1000       | Actinidiaceae   | <i>Saurauia sp1</i>             | 8      | E                                                 | A                                                          | U                                          |
| 1000       | Annonaceae      | <i>Guatteria pastazae</i>       | 6      | I                                                 | I                                                          | C                                          |
| 1000       | Apocynaceae     | <i>Aspidosperma rigidum</i>     | 8      | L                                                 | C                                                          | C                                          |
| 1000       | Clusiaceae      | <i>Chrysochlamys</i>            | 8      | L                                                 | C                                                          | U                                          |
| 1000       | Euphorbiaceae   | <i>Alchornea glandulosa</i>     | 9      | E                                                 | A                                                          | I                                          |
| 1000       | Fabaceae        | <i>Parkia sp1</i>               | 8      | I                                                 | I                                                          | C                                          |
| 1000       | Lauraceae       | <i>Ocotea sp1</i>               | 8      | L                                                 | C                                                          | C                                          |
| 1000       | Lecythidaceae   | <i>Grias peruviana</i>          | 8      | L                                                 | C                                                          | U                                          |
| 1000       | Malvaceae       | <i>Mollia gracilis</i>          | 7      | E                                                 | A                                                          | C                                          |
| 1000       | Melastomataceae | <i>Miconia aff punctata</i>     | 8      | E                                                 | I                                                          | U                                          |
| 1000       | Meliaceae       | <i>Guarea macrophylla</i>       | 8      | I                                                 | I                                                          | U                                          |
| 1000       | Moraceae        | <i>Clarisia racemosa</i>        | 8      | L                                                 | C                                                          | C                                          |
| 1000       | Moraceae        | <i>Pseudolmedia laevis</i>      | 8      | I                                                 | I                                                          | C                                          |
| 1000       | Myristicaceae   | <i>Otoba parvifolia</i>         | 8      | E                                                 | A                                                          | C                                          |
| 1000       | Phyllanthaceae  | <i>Hieronyma oblonga</i>        | 8      | I                                                 | I                                                          | C                                          |
| 1000       | Rubiaceae       | <i>Ladenbergia oblongifolia</i> | 8      | I                                                 | I                                                          | C                                          |
| 1000       | Rubiaceae       | <i>Warszewiczia coccinea</i>    | 8      | L                                                 | I                                                          | I                                          |
| 1000       | Sapotaceae      | <i>Pouteria torta</i>           | 8      | L                                                 | C                                                          | C                                          |
| 1000       | Urticaceae      | <i>Pourouma cecropiifolia</i>   | 6      | E                                                 | A                                                          | I                                          |
| 1000       | Violaceae       | <i>Leonia crassa</i>            | 8      | L                                                 | C                                                          | C                                          |
| 2000       | Alzateaceae     | <i>Alzatea verticillata</i>     | 9      | I                                                 | I                                                          | C                                          |
| 2000       | Anacardiaceae   | <i>Tapirira guianensis</i>      | 9      | E                                                 | A                                                          | C                                          |
| 2000       | Chloranthaceae  | <i>Hedyosmum goudotianum</i>    | 8      | E                                                 | A                                                          | U                                          |
| 2000       | Clusiaceae      | <i>Clusia ducuoides</i>         | 8      | L                                                 | I                                                          | C                                          |
| 2000       | Cunoniaceae     | <i>Weinmannia microphylla</i>   | 8      | L                                                 | I                                                          | I                                          |
| 2000       | Euphorbiaceae   | <i>Alchornea lojaensis</i>      | 9      | L                                                 | I                                                          | C                                          |
| 2000       | Lauraceae       | <i>Ocotea andina</i>            | 9      | L                                                 | I                                                          | C                                          |
| 2000       | Malvaceae       | <i>Heliocharpus americanus</i>  | 8      | E                                                 | A                                                          | I                                          |
| 2000       | Melastomataceae | <i>Graffenrieda emarginata</i>  | 8      | I                                                 | I                                                          | I                                          |
| 2000       | Melastomataceae | <i>Meriania franciscana</i>     | 5      | I                                                 | I                                                          | C                                          |
| 2000       | Melastomataceae | <i>Miconia calophylla</i>       | 8      | E                                                 | A                                                          | I                                          |
| 2000       | Meliaceae       | <i>Ruagea glabra</i>            | 8      | I                                                 | I                                                          | I                                          |

|      |                 |                                |    |   |   |   |
|------|-----------------|--------------------------------|----|---|---|---|
| 2000 | Moraceae        | <i>Naucleopsis francisci</i>   | 9  | L | C | C |
| 2000 | Myrtaceae       | <i>Myrcia sp1</i>              | 8  | L | C | I |
| 2000 | Phyllanthaceae  | <i>Hieronyma fendleri</i>      | 9  | I | I | C |
| 2000 | Podocarpaceae   | <i>Podocarpus oleifolius</i>   | 9  | L | C | C |
| 2000 | Primulaceae     | <i>Myrsine coriacea</i>        | 8  | I | I | I |
| 2000 | Rubiaceae       | <i>Elaeagia mollis</i>         | 8  | I | I | I |
| 2000 | Sapindaceae     | <i>Matayba inelegans</i>       | 10 | L | C | I |
| 2000 | Urticaceae      | <i>Cecropia angustifolia</i>   | 10 | E | A | I |
| 3000 | Aquifoliaceae   | <i>Ilex laurina</i>            | 8  | L | C | C |
| 3000 | Araliaceae      | <i>Oreopanax sessiliflorus</i> | 8  | I | I | I |
| 3000 | Asteraceae      | <i>Critoniopsis pycnantha</i>  | 8  | E | A | I |
| 3000 | Chloranthaceae  | <i>Hedyosmum purpurascens</i>  | 8  | E | A | U |
| 3000 | Clethraceae     | <i>Clethra revoluta</i>        | 8  | I | I | C |
| 3000 | Clusiaceae      | <i>Clusia elliptica</i>        | 8  | L | C | I |
| 3000 | Cunoniaceae     | <i>Weinmannia elliptica</i>    | 8  | L | C | C |
| 3000 | Lauraceae       | <i>Aiouea dubia</i>            | 8  | L | C | C |
| 3000 | Lauraceae       | <i>Ocotea rotundata</i>        | 8  | L | C | C |
| 3000 | Melastomataceae | <i>Miconia cf jahnii</i>       | 8  | E | A | I |
| 3000 | Siparunaceae    | <i>Siparuna muricata</i>       | 8  | E | A | U |
| 3000 | Theaceae        | <i>Gordonia fruticosa</i>      | 9  | L | C | C |

**Appendix A3:** Phylogenetic tree of the study species.

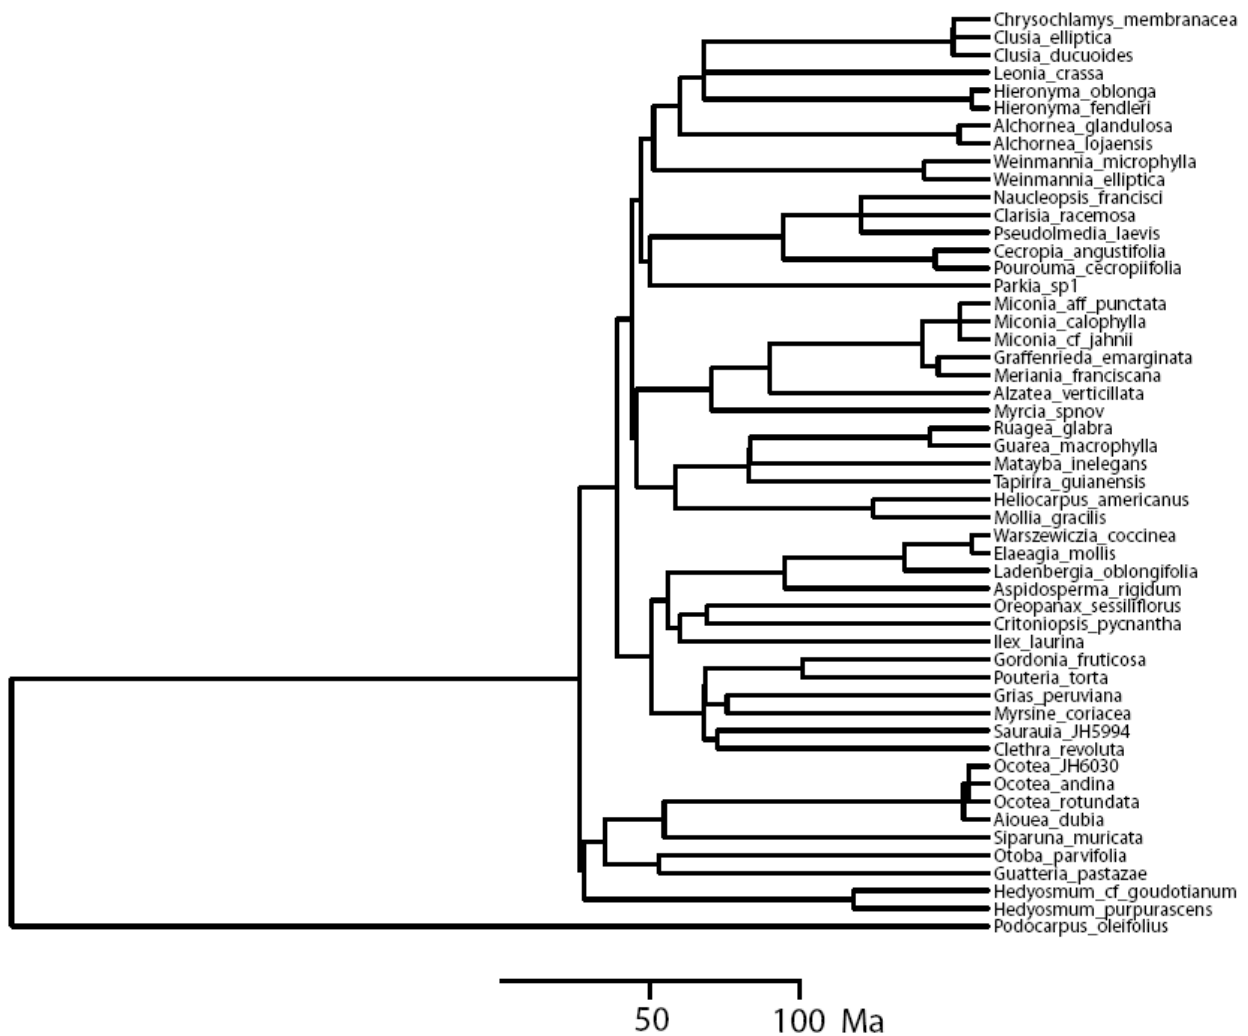

**Appendix A4:** Model results. Parameter estimates, estimate errors, highest density intervals (HDI), Rhat, Bulk effective sample size (ESS) and Tail effective sample size are given for all estimated parameters of twelve phylogenetic mixed models describing the effect of site on leaf traits. Parameters describing standard deviations of random intercept and the residual standard deviation are labelled sd\_. The site coefficients for Ca and Bo describe the mean differences in leaf traits at the sites Cajanuma (3000 m) and Bombuscaro (1000 m) compared to the site San Francisco (2000 m). Site coefficients credibly different from zero are bold.

|                  | Estimate      | Est.Error    | HDI_low       | HDI_high      | Rhat  | Bulk_ESS | Tail_ESS |
|------------------|---------------|--------------|---------------|---------------|-------|----------|----------|
| <b>AI</b>        |               |              |               |               |       |          |          |
| Intercept        | -3.361        | 1.217        | -5.824        | -1.027        | 1     | 6316     | 6446     |
| site_Bo          | 0.588         | 0.369        | -0.162        | 1.308         | 1     | 7101     | 6778     |
| <b>site_Ca</b>   | <b>1.093</b>  | <b>0.421</b> | <b>0.265</b>  | <b>1.93</b>   | 1     | 7345     | 6932     |
| sd_plot          | 0.263         | 0.142        | 0.028         | 0.535         | 1.003 | 3863     | 4550     |
| sd_species       | 0.519         | 0.186        | 0.132         | 0.89          | 1.001 | 1680     | 1672     |
| sd_phylo         | 1.935         | 0.318        | 1.343         | 2.579         | 1.001 | 3462     | 5187     |
| sd_residual      | 0.748         | 0.029        | 0.693         | 0.806         | 1.001 | 15451    | 7112     |
| <b>Leaf area</b> |               |              |               |               |       |          |          |
| Intercept        | 3.284         | 1.221        | 0.885         | 5.683         | 1.001 | 4336     | 5010     |
| <b>site_Bo</b>   | <b>0.756</b>  | <b>0.229</b> | <b>0.281</b>  | <b>1.182</b>  | 1.001 | 5454     | 5323     |
| <b>site_Ca</b>   | <b>-1.295</b> | <b>0.28</b>  | <b>-1.832</b> | <b>-0.717</b> | 1.001 | 5952     | 5994     |
| sd_plot          | 0.055         | 0.047        | 0             | 0.141         | 1.001 | 4054     | 5331     |
| sd_species       | 0.285         | 0.206        | 0             | 0.674         | 1.01  | 634      | 1047     |
| sd_phylo         | 1.965         | 0.336        | 1.289         | 2.641         | 1.004 | 1291     | 1338     |
| sd_residual      | 0.321         | 0.013        | 0.297         | 0.346         | 1.001 | 15237    | 6532     |
| <b>Ca</b>        |               |              |               |               |       |          |          |
| Intercept        | 1.233         | 0.411        | 0.404         | 2.089         | 1     | 9083     | 5397     |
| <b>site_Bo</b>   | <b>0.827</b>  | <b>0.24</b>  | <b>0.357</b>  | <b>1.317</b>  | 1     | 7160     | 6655     |
| site_Ca          | 0.442         | 0.259        | -0.061        | 0.968         | 1     | 8081     | 6660     |
| sd_plot          | 0.202         | 0.091        | 0.074         | 0.38          | 1     | 5972     | 7154     |
| sd_species       | 0.405         | 0.095        | 0.219         | 0.582         | 1.003 | 1554     | 4139     |
| sd_phylo         | 0.536         | 0.235        | 0.012         | 0.915         | 1.004 | 1110     | 1970     |
| sd_residual      | 0.343         | 0.013        | 0.318         | 0.368         | 1     | 12669    | 7380     |
| <b>DMC</b>       |               |              |               |               |       |          |          |
| Intercept        | 5.86          | 0.22         | 5.431         | 6.302         | 1     | 6349     | 6321     |
| site_Bo          | -0.056        | 0.061        | -0.17         | 0.07          | 1.001 | 7484     | 6830     |
| site_Ca          | 0.105         | 0.069        | -0.03         | 0.242         | 1     | 7993     | 7119     |
| sd_plot          | 0.033         | 0.022        | 0             | 0.073         | 1.001 | 3734     | 5059     |
| sd_species       | 0.089         | 0.044        | 0             | 0.164         | 1.005 | 907      | 1524     |
| sd_phylo         | 0.335         | 0.075        | 0.188         | 0.483         | 1.001 | 1437     | 1566     |

|             | Estimate      | Est.Error    | HDI_low       | HDI_high      | Rhat  | Bulk_ESS | Tail_ESS |
|-------------|---------------|--------------|---------------|---------------|-------|----------|----------|
| sd_residual | 0.145         | 0.005        | 0.135         | 0.156         | 1     | 14641    | 6673     |
| <b>K</b>    |               |              |               |               |       |          |          |
| Intercept   | 2.135         | 0.449        | 1.225         | 3.008         | 1.001 | 4434     | 5764     |
| site_Bo     | -0.183        | 0.259        | -0.705        | 0.313         | 1     | 5197     | 5119     |
| site_Ca     | -0.233        | 0.268        | -0.746        | 0.323         | 1.001 | 4260     | 4971     |
| sd_plot     | 0.25          | 0.115        | 0.086         | 0.485         | 1     | 3859     | 5752     |
| sd_species  | 0.168         | 0.099        | 0             | 0.342         | 1.002 | 783      | 1328     |
| sd_phylo    | 0.634         | 0.151        | 0.333         | 0.934         | 1.001 | 1258     | 1314     |
| sd_residual | 0.431         | 0.016        | 0.4           | 0.464         | 1     | 12321    | 7101     |
| <b>Mg</b>   |               |              |               |               |       |          |          |
| Intercept   | 0.918         | 0.436        | 0.054         | 1.797         | 1.001 | 8244     | 6991     |
| site_Bo     | 0.051         | 0.173        | -0.281        | 0.39          | 1     | 7830     | 5570     |
| site_Ca     | -0.076        | 0.193        | -0.443        | 0.299         | 1     | 6985     | 5534     |
| sd_plot     | 0.149         | 0.074        | 0.057         | 0.283         | 1     | 5257     | 5752     |
| sd_species  | 0.221         | 0.085        | 0.065         | 0.411         | 1.004 | 1137     | 1754     |
| sd_phylo    | 0.637         | 0.159        | 0.308         | 0.949         | 1.004 | 1382     | 1446     |
| sd_residual | 0.251         | 0.009        | 0.232         | 0.269         | 1     | 12985    | 7202     |
| <b>N</b>    |               |              |               |               |       |          |          |
| Intercept   | 2.721         | 0.287        | 2.137         | 3.285         | 1.001 | 5117     | 5561     |
| site_Bo     | <b>0.22</b>   | <b>0.083</b> | <b>0.059</b>  | <b>0.388</b>  | 1     | 6105     | 5953     |
| site_Ca     | -0.155        | 0.097        | -0.351        | 0.03          | 1     | 5575     | 6668     |
| sd_plot     | 0.055         | 0.027        | 0.015         | 0.107         | 1     | 4315     | 5687     |
| sd_species  | 0.134         | 0.051        | 0.033         | 0.237         | 1.002 | 1103     | 1606     |
| sd_phylo    | 0.432         | 0.098        | 0.245         | 0.625         | 1.001 | 1429     | 1658     |
| sd_residual | 0.117         | 0.004        | 0.109         | 0.125         | 1     | 14807    | 7890     |
| <b>N:P</b>  |               |              |               |               |       |          |          |
| Intercept   | 2.764         | 0.137        | 2.485         | 3.035         | 1.001 | 6376     | 5534     |
| site_Bo     | 0.161         | 0.126        | -0.075        | 0.413         | 1     | 5477     | 5479     |
| site_Ca     | 0.035         | 0.131        | -0.217        | 0.292         | 1.001 | 5589     | 5429     |
| sd_plot     | 0.129         | 0.056        | 0.051         | 0.234         | 1     | 4759     | 5483     |
| sd_species  | 0.145         | 0.03         | 0.085         | 0.204         | 1.003 | 1221     | 1725     |
| sd_phylo    | 0.134         | 0.082        | 0             | 0.281         | 1.005 | 660      | 1641     |
| sd_residual | 0.132         | 0.005        | 0.122         | 0.142         | 1.001 | 15539    | 7456     |
| <b>P</b>    |               |              |               |               |       |          |          |
| Intercept   | -0.029        | 0.365        | -0.781        | 0.666         | 1.001 | 4470     | 5159     |
| site_Bo     | 0.028         | 0.162        | -0.293        | 0.338         | 1     | 4530     | 5582     |
| site_Ca     | -0.196        | 0.168        | -0.507        | 0.142         | 1     | 4880     | 5380     |
| sd_plot     | 0.17          | 0.076        | 0.072         | 0.309         | 1.001 | 4902     | 5541     |
| sd_species  | 0.064         | 0.048        | 0             | 0.154         | 1.007 | 609      | 1169     |
| sd_phylo    | 0.561         | 0.075        | 0.421         | 0.716         | 1.003 | 1774     | 2040     |
| sd_residual | 0.172         | 0.006        | 0.16          | 0.185         | 1.001 | 13140    | 7713     |
| <b>SLA</b>  |               |              |               |               |       |          |          |
| Intercept   | 4.269         | 0.217        | 3.827         | 4.709         | 1.001 | 7564     | 6097     |
| site_Bo     | <b>0.449</b>  | <b>0.142</b> | <b>0.174</b>  | <b>0.702</b>  | 1.001 | 5301     | 5632     |
| site_Ca     | <b>-0.294</b> | <b>0.152</b> | <b>-0.588</b> | <b>-0.011</b> | 1     | 5446     | 5791     |

|                       | Estimate      | Est.Error    | HDI_low       | HDI_high      | Rhat  | Bulk_ESS | Tail_ESS |
|-----------------------|---------------|--------------|---------------|---------------|-------|----------|----------|
| sd_plot               | 0.121         | 0.062        | 0.043         | 0.224         | 1.001 | 4838     | 4968     |
| sd_species            | 0.207         | 0.044        | 0.122         | 0.294         | 1.002 | 1805     | 3891     |
| sd_phylo              | 0.277         | 0.108        | 0.033         | 0.467         | 1.003 | 1364     | 1630     |
| sd_residual           | 0.164         | 0.006        | 0.153         | 0.176         | 1     | 12268    | 7177     |
| <b>Leaf thickness</b> |               |              |               |               |       |          |          |
| Intercept             | -1.166        | 0.191        | -1.526        | -0.757        | 1.001 | 10439    | 7284     |
| <b>site_Bo</b>        | <b>-0.363</b> | <b>0.11</b>  | <b>-0.582</b> | <b>-0.146</b> | 1     | 7611     | 6948     |
| site_Ca               | 0.242         | 0.126        | -0.008        | 0.486         | 1     | 7257     | 6588     |
| sd_plot               | 0.08          | 0.036        | 0.031         | 0.151         | 1     | 5248     | 7166     |
| sd_species            | 0.238         | 0.04         | 0.164         | 0.317         | 1.001 | 2262     | 4158     |
| sd_phylo              | 0.246         | 0.107        | 0.004         | 0.415         | 1.002 | 1224     | 1804     |
| sd_residual           | 0.12          | 0.005        | 0.111         | 0.129         | 1.001 | 12461    | 5910     |
| <b>Leaf toughness</b> |               |              |               |               |       |          |          |
| Intercept             | 0.171         | 0.477        | -0.782        | 1.135         | 1.001 | 4955     | 5287     |
| <b>site_Bo</b>        | <b>-0.316</b> | <b>0.137</b> | <b>-0.578</b> | <b>-0.049</b> | 1.001 | 4134     | 6052     |
| site_Ca               | 0.227         | 0.153        | -0.081        | 0.525         | 1.001 | 7206     | 7166     |
| sd_plot               | 0.078         | 0.037        | 0.024         | 0.15          | 1.001 | 3918     | 5509     |
| sd_species            | 0.224         | 0.101        | 0.015         | 0.413         | 1.004 | 731      | 1108     |
| sd_phylo              | 0.716         | 0.193        | 0.342         | 1.101         | 1.003 | 892      | 1066     |
| sd_residual           | 0.133         | 0.005        | 0.123         | 0.142         | 1     | 11840    | 6974     |



**Appendix A5:** Intraspecific trait variation at the three study sites, tree species are ordered by their mean values and genus names of species with high or low values are given.

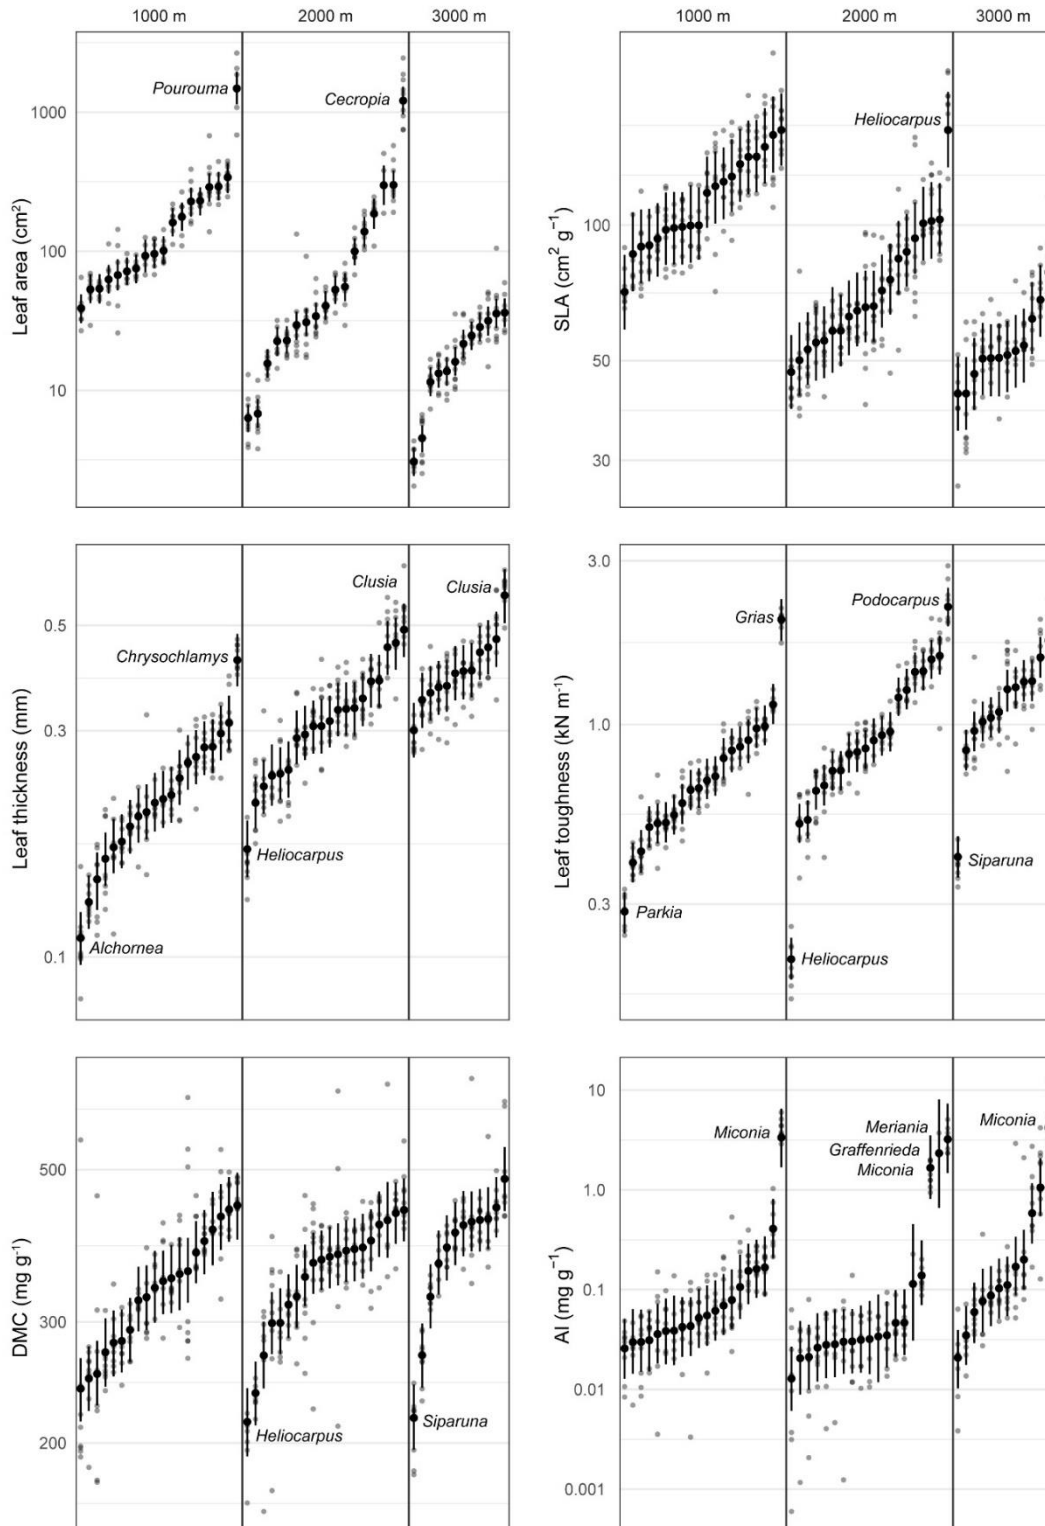

Appendix A5: continued

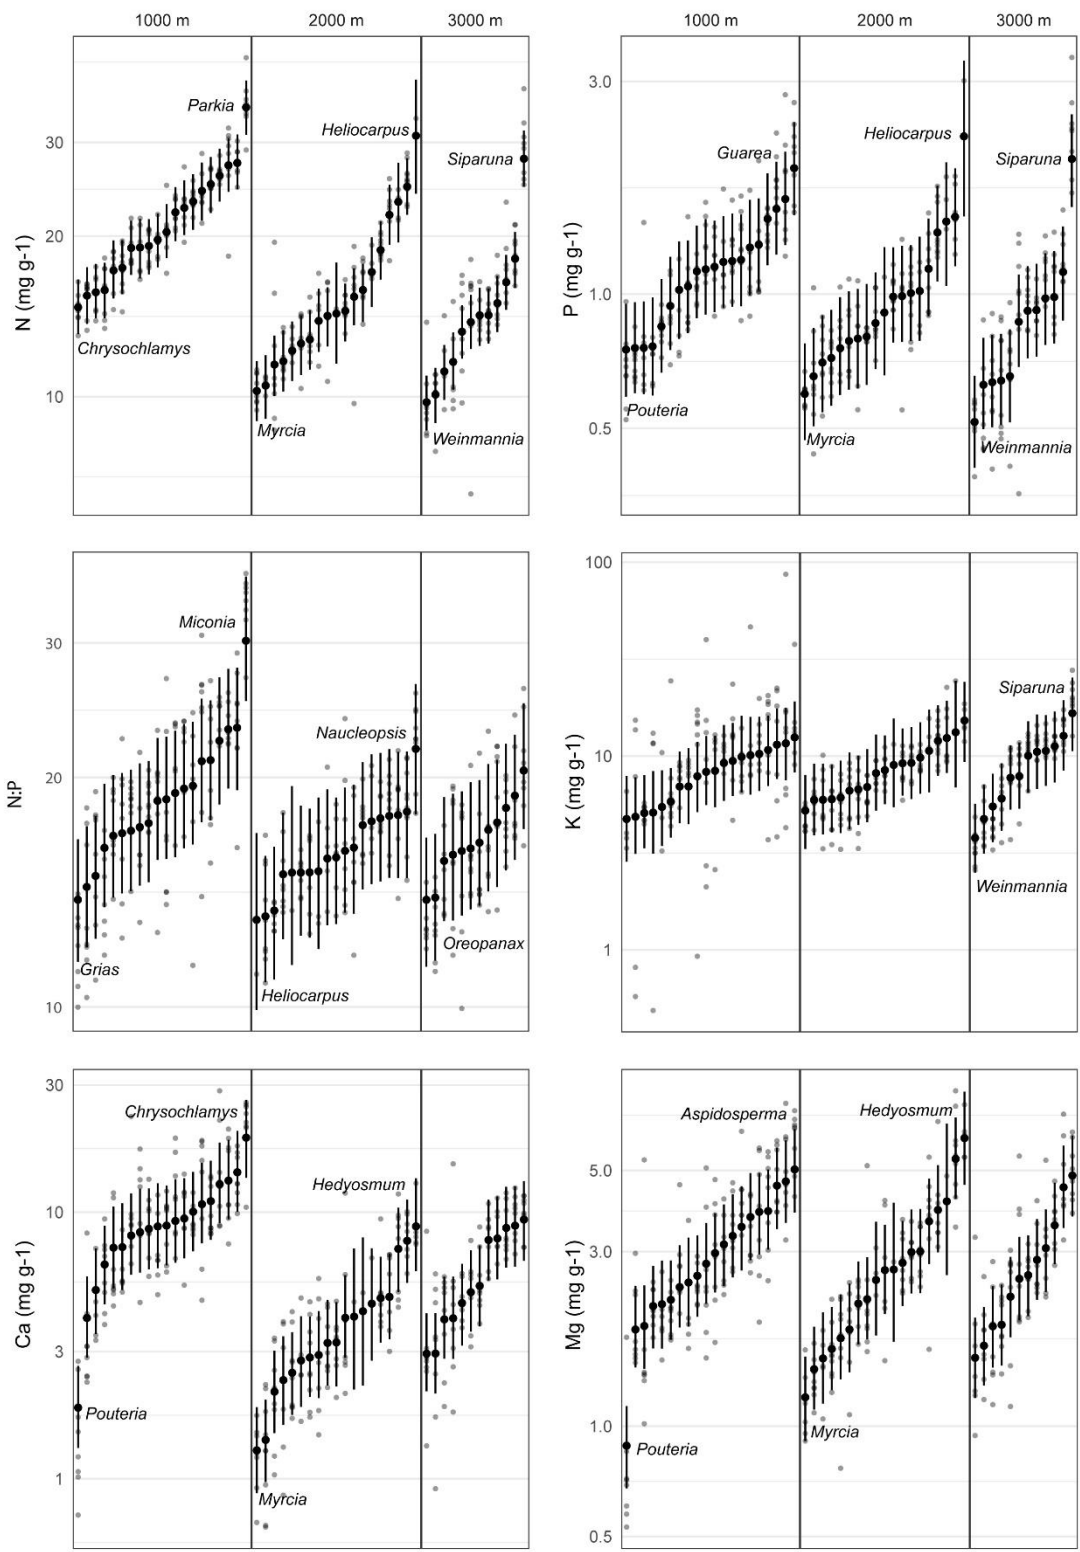

**Appendix A6:** Results of functional diversity partitioning into between- and within-species effects (Figure 4).

|                       | <b>1000m</b>            |          | <b>2000m</b>            |          | <b>3000m</b>            |          |
|-----------------------|-------------------------|----------|-------------------------|----------|-------------------------|----------|
|                       | <b>funct. diversity</b> | <b>%</b> | <b>funct. diversity</b> | <b>%</b> | <b>funct. diversity</b> | <b>%</b> |
| <b>Leaf area</b>      |                         |          |                         |          |                         |          |
| Between species       | 0.0029                  | 72.28    | 0.0115                  | 85.25    | 0.0253                  | 81.01    |
| Within species        | 0.0011                  | 27.72    | 0.0020                  | 14.75    | 0.0059                  | 18.99    |
| Total                 | 0.0040                  |          | 0.0135                  |          | 0.0312                  |          |
| <b>SLA</b>            |                         |          |                         |          |                         |          |
| Between species       | 0.0322                  | 60.27    | 0.0131                  | 63.40    | 0.0113                  | 55.91    |
| Within species        | 0.0212                  | 39.73    | 0.0075                  | 36.60    | 0.0089                  | 44.09    |
| Total                 | 0.0534                  |          | 0.0206                  |          | 0.0201                  |          |
| <b>Leaf thickness</b> |                         |          |                         |          |                         |          |
| Between species       | 0.0292                  | 85.43    | 0.0205                  | 76.27    | 0.0203                  | 59.45    |
| Within species        | 0.0050                  | 14.57    | 0.0064                  | 23.73    | 0.0138                  | 40.55    |
| Total                 | 0.0341                  |          | 0.0269                  |          | 0.0341                  |          |
| <b>Leaf toughness</b> |                         |          |                         |          |                         |          |
| Between species       | 0.0123                  | 90.01    | 0.0230                  | 90.26    | 0.0123                  | 61.76    |
| Within species        | 0.0014                  | 9.99     | 0.0025                  | 9.74     | 0.0076                  | 38.24    |
| Total                 | 0.0136                  |          | 0.0254                  |          | 0.0200                  |          |
| <b>DMC</b>            |                         |          |                         |          |                         |          |
| Between species       | 0.0158                  | 39.32    | 0.0088                  | 39.39    | 0.0393                  | 61.57    |
| Within species        | 0.0244                  | 60.68    | 0.0136                  | 60.61    | 0.0246                  | 38.43    |
| Total                 | 0.0401                  |          | 0.0224                  |          | 0.0639                  |          |
| <b>Foliar N</b>       |                         |          |                         |          |                         |          |
| Between species       | 0.0253                  | 86.46    | 0.0212                  | 90.39    | 0.0128                  | 78.76    |
| Within species        | 0.0040                  | 13.54    | 0.0023                  | 9.61     | 0.0035                  | 21.24    |
| Total                 | 0.0293                  |          | 0.0235                  |          | 0.0163                  |          |
| <b>Foliar P</b>       |                         |          |                         |          |                         |          |
| Between species       | 0.0205                  | 65.40    | 0.0063                  | 77.52    | 0.0082                  | 75.86    |
| Within species        | 0.0108                  | 34.60    | 0.0018                  | 22.48    | 0.0026                  | 24.14    |
| Total                 | 0.0314                  |          | 0.0081                  |          | 0.0109                  |          |
| <b>Foliar N:P</b>     |                         |          |                         |          |                         |          |
| Between species       | 0.0155                  | 56.78    | 0.0168                  | 61.68    | 0.0208                  | 49.85    |
| Within species        | 0.0118                  | 43.22    | 0.0104                  | 38.32    | 0.0210                  | 50.15    |
| Total                 | 0.0274                  |          | 0.0273                  |          | 0.0418                  |          |
| <b>Foliar Al</b>      |                         |          |                         |          |                         |          |
| Between species       | 0.0070                  | 92.68    | 0.0509                  | 92.38    | 0.0097                  | 58.79    |
| Within species        | 0.0006                  | 7.32     | 0.0042                  | 7.62     | 0.0068                  | 41.21    |
| Total                 | 0.0076                  |          | 0.0551                  |          | 0.0165                  |          |
| <b>Foliar Ca</b>      |                         |          |                         |          |                         |          |
| Between species       | 0.0163                  | 56.43    | 0.0201                  | 62.31    | 0.0283                  | 67.64    |
| Within species        | 0.0126                  | 43.57    | 0.0121                  | 37.69    | 0.0135                  | 32.36    |
| Total                 | 0.0289                  |          | 0.0322                  |          | 0.0418                  |          |
| <b>Foliar K</b>       |                         |          |                         |          |                         |          |
| Between species       | 0.0017                  | 20.20    | 0.0096                  | 74.09    | 0.0258                  | 85.88    |
| Within species        | 0.0068                  | 79.80    | 0.0034                  | 25.91    | 0.0042                  | 14.12    |
| Total                 | 0.0086                  |          | 0.0130                  |          | 0.0301                  |          |
| <b>Foliar Mg</b>      |                         |          |                         |          |                         |          |
| Between species       | 0.0322                  | 76.19    | 0.0227                  | 75.75    | 0.0333                  | 75.94    |
| Within species        | 0.0101                  | 23.81    | 0.0072                  | 24.25    | 0.0106                  | 24.06    |
| Total                 | 0.0423                  |          | 0.0299                  |          | 0.0439                  |          |

**Appendix A7: PCA results (Figure 4).**

**Importance of components**

|                               | <b>PC1</b> | <b>PC2</b> | <b>PC3</b> | <b>PC4</b> | <b>PC5</b> |
|-------------------------------|------------|------------|------------|------------|------------|
| <b>Standard deviation</b>     | 22.309     | 14.037     | 11.153     | 0.99531    | 0.9340     |
| <b>Proportion of Variance</b> | 0.4147     | 0.1642     | 0.1037     | 0.08255    | 0.0727     |
| <b>Cumulative Proportion</b>  | 0.4147     | 0.5789     | 0.6826     | 0.76515    | 0.8378     |

**Factor loadings**

|                  | <b>PC1</b> | <b>PC2</b> | <b>PC3</b> | <b>PC4</b> | <b>PC5</b> |
|------------------|------------|------------|------------|------------|------------|
| <b>LA</b>        | 0.106      | -0.089     | 0.273      | -0.870     | 0.289      |
| <b>SLA</b>       | 0.375      | -0.243     | -0.001     | 0.275      | 0.111      |
| <b>thickness</b> | -0.295     | 0.414      | -0.251     | -0.013     | -0.035     |
| <b>toughness</b> | -0.311     | 0.316      | 0.079      | 0.020      | -0.010     |
| <b>DMC</b>       | -0.289     | -0.309     | 0.286      | 0.016      | -0.193     |
| <b>N</b>         | 0.395      | -0.164     | 0.087      | 0.058      | -0.167     |
| <b>P</b>         | 0.385      | 0.169      | 0.234      | -0.007     | -0.293     |
| <b>N:P</b>       | -0.052     | -0.581     | -0.339     | 0.059      | 0.103      |
| <b>Al</b>        | -0.115     | -0.202     | -0.514     | -0.375     | -0.617     |
| <b>Ca</b>        | 0.238      | 0.100      | -0.461     | -0.096     | 0.432      |
| <b>K</b>         | 0.341      | 0.206      | 0.045      | -0.090     | -0.416     |
| <b>Mg</b>        | 0.296      | 0.282      | -0.346     | -0.035     | 0.038      |

**Appendix A8:** Network characteristics as indicators of network centrality for the 12 studied leaf traits at the three study sites.

|                      | <b>1000m</b> | <b>2000m</b> | <b>3000m</b> |
|----------------------|--------------|--------------|--------------|
| <b>Degree</b>        |              |              |              |
| Leaf area            | 0            | 0            | 3            |
| SLA                  | 4            | 7            | 7            |
| Thickness            | 3            | 6            | 4            |
| Toughness            | 2            | 8            | 6            |
| DMC                  | 2            | 7            | 6            |
| N                    | 4            | 7            | 7            |
| P                    | 3            | 8            | 8            |
| N:P                  | 2            | 1            | 3            |
| Al                   | 1            | 0            | 0            |
| Ca                   | 1            | 3            | 2            |
| K                    | 1            | 7            | 9            |
| Mg                   | 3            | 8            | 7            |
| <b>Node Strength</b> |              |              |              |
| Leaf area            | 0            | 0            | 23           |
| SLA                  | 24           | 51           | 54           |
| Thickness            | 16           | 34           | 26           |
| Toughness            | 12           | 44           | 40           |
| DMC                  | 13           | 42           | 40           |
| N                    | 25           | 48           | 54           |
| P                    | 19           | 52           | 60           |
| N:P                  | 13           | 5            | 23           |
| Al                   | 7            | 0            | 0            |
| Ca                   | 6            | 17           | 14           |
| K                    | 5            | 48           | 65           |
| Mg                   | 18           | 47           | 47           |
| <b>Betweenness</b>   |              |              |              |
| Leaf area            | 0            | 0            | 0            |
| SLA                  | 0.37         | 0            | 0            |
| Thickness            | 0.44         | 0            | 0            |
| Toughness            | 0            | 0.10         | 0.02         |
| DMC                  | 0.38         | 0            | 0.07         |
| N                    | 0.05         | 0            | 0.01         |
| P                    | 0.29         | 0.15         | 0.09         |
| N:P                  | 0.16         | 0            | 0            |
| Al                   | 0            | 0            | 0            |
| Ca                   | 0            | 0            | 0            |
| K                    | 0            | 0            | 0.23         |
| Mg                   | 0.31         | 0.02         | 0.07         |
